# Supplementary material for: Fine Identification and Classification of a Novel Beneficial Talaromyces Fungal Species from Masson Pine Rhizosphere Soil
Source: MDPI journal article supplement (doi:10.3390/jof8020155), 2022-02-03
Supplement: s1 [file s1]

Supplementary materials

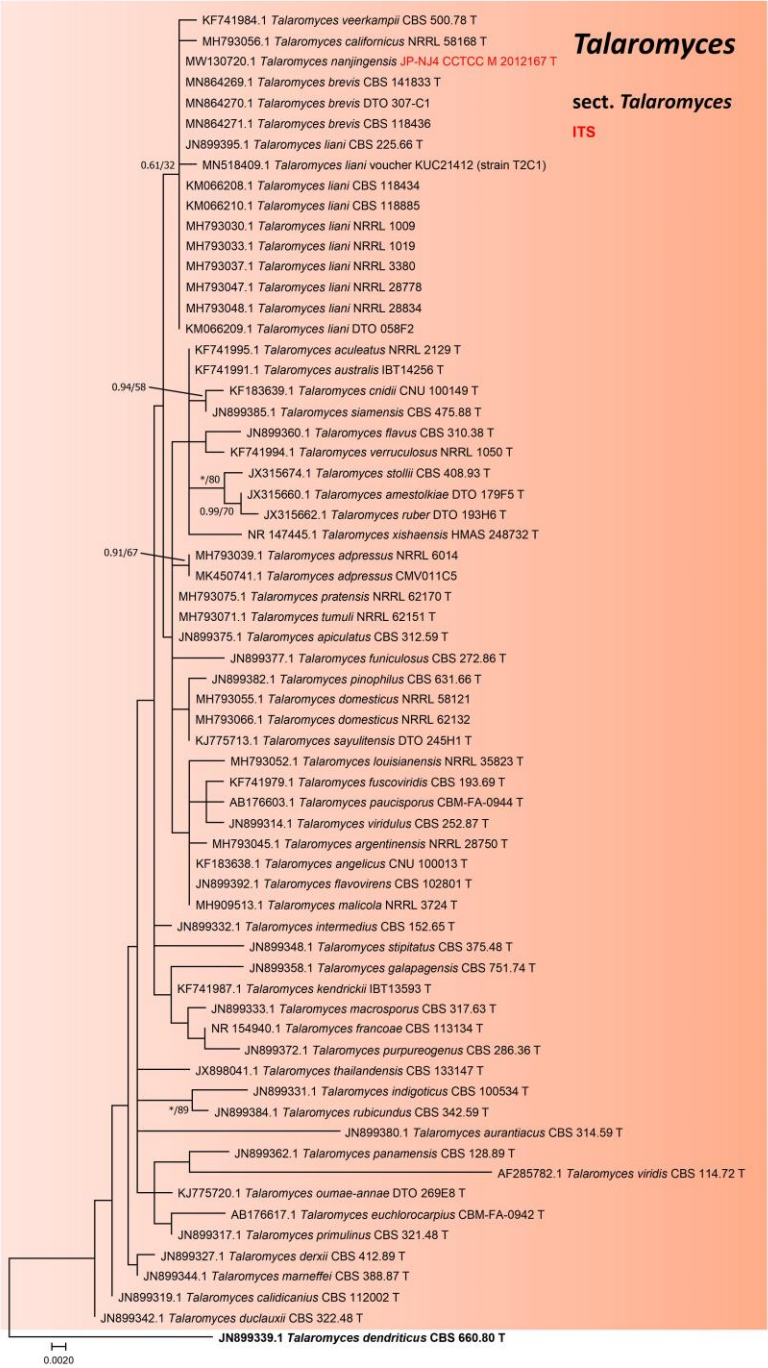

Figure S1 Maximum likelihood phylogeny of ITS regions for strain JP-NJ4 and other species classified in *Talaromyces* sect. *Talaromyces*. *Talaromyces dendriticus* (CBS\_660.80\_T) was chosen as out-group. Support in nodes is indicated above branches and is represented by posterior probabilities (BI analysis) and bootstrap values (ML analysis). Full support (1.00/100%) is indicated with an asterisk (\*). Bootstrap values lower than 50 is hidden. Best-fit model of Bayesian Inference phylogeny according to BIC: GTR+F+I+G4; Best-fit model of Maximum likelihood phylogeny according to AIC: Tamura 3-parameter (T92) +G+I; alignment, ITS 467 bp. Scale bar: 0.0020 substitutions per nucleotide position. T indicates ex type. The strain with red font is the strain JP-NJ4 to be identified.

# Talaromyces

## sect. *Talaromyces*

CaM

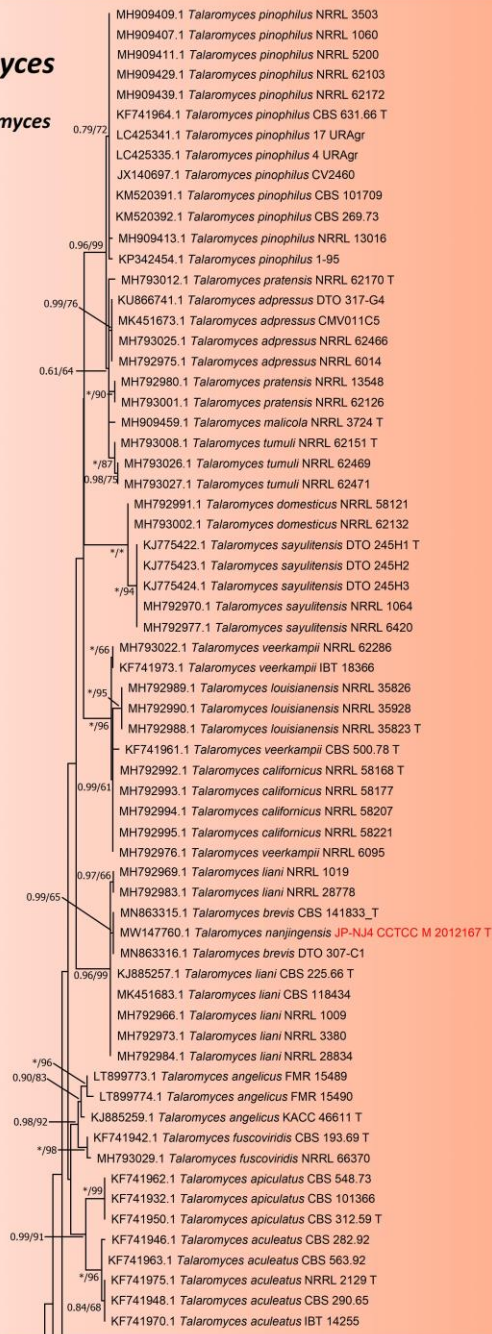

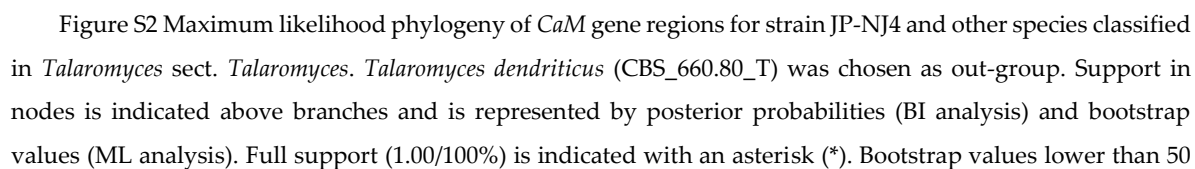

is hidden. Best-fit model of Bayesian Inference phylogeny according to BIC: SYM+I+G4; Best-fit model of Maximum likelihood phylogeny according to AIC: Kimura 2-parameter (K2) +G+I; alignment, *CaM* 475 bp. Scale bar: 0.05 substitutions per nucleotide position. T indicates ex type. The strain with red font is the strain JP-NJ4 to be identified.

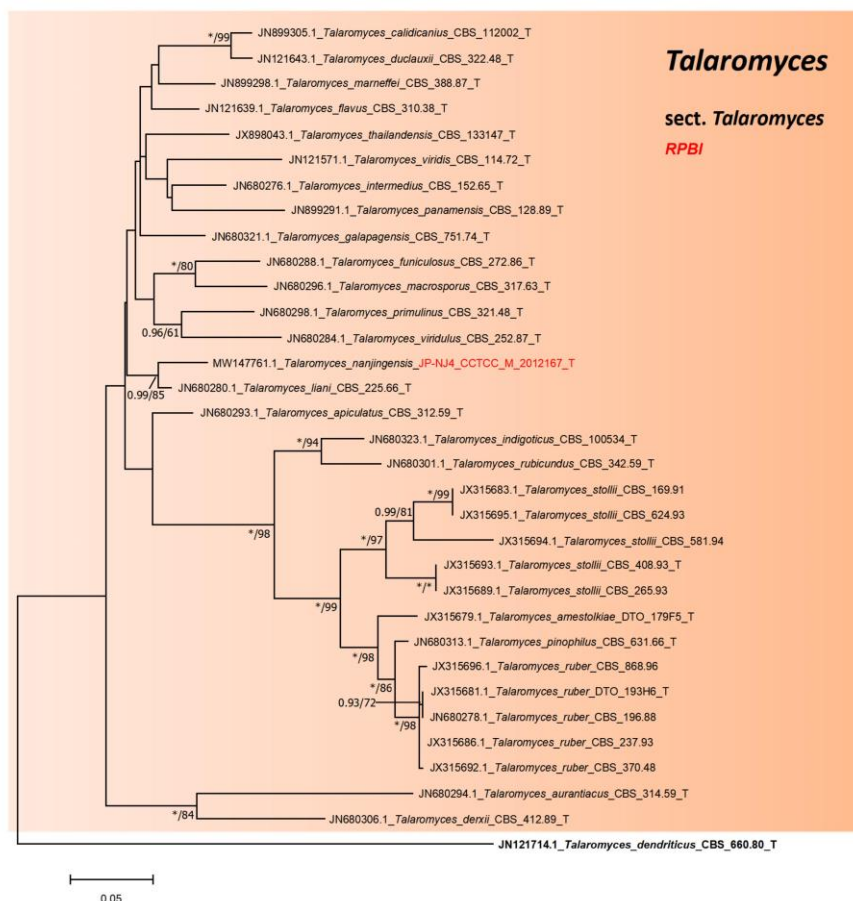

Figure S3 Maximum likelihood phylogeny of *RPBI* gene regions for strain JP-NJ4 and other species classified in *Talaromyces* sect. *Talaromyces*. *Talaromyces dendriticus* (CBS\_660.80\_T) was chosen as out-group. Support in nodes is indicated above branches and is represented by posterior probabilities (BI analysis) and bootstrap values (ML analysis). Full support (1.00/100%) is indicated with an asterisk (\*). Bootstrap values lower than 50 is hidden. Support in nodes is indicated above branches and is represented by posterior probabilities (BI analysis) and bootstrap values (ML analysis). Full support (1.00/100%) is indicated with an asterisk (\*). Best-fit model of Bayesian Inference phylogeny according to BIC: SYM+I+G; Best-fit model of Maximum likelihood phylogeny according to AIC: Kimura 2-parameter (K2) + G + I; alignment, *RPBI* 491 bp. Scale bar: 0.05 substitutions per nucleotide position. T indicates ex type. The strain with red font is the strain JP-NJ4 to be identified.



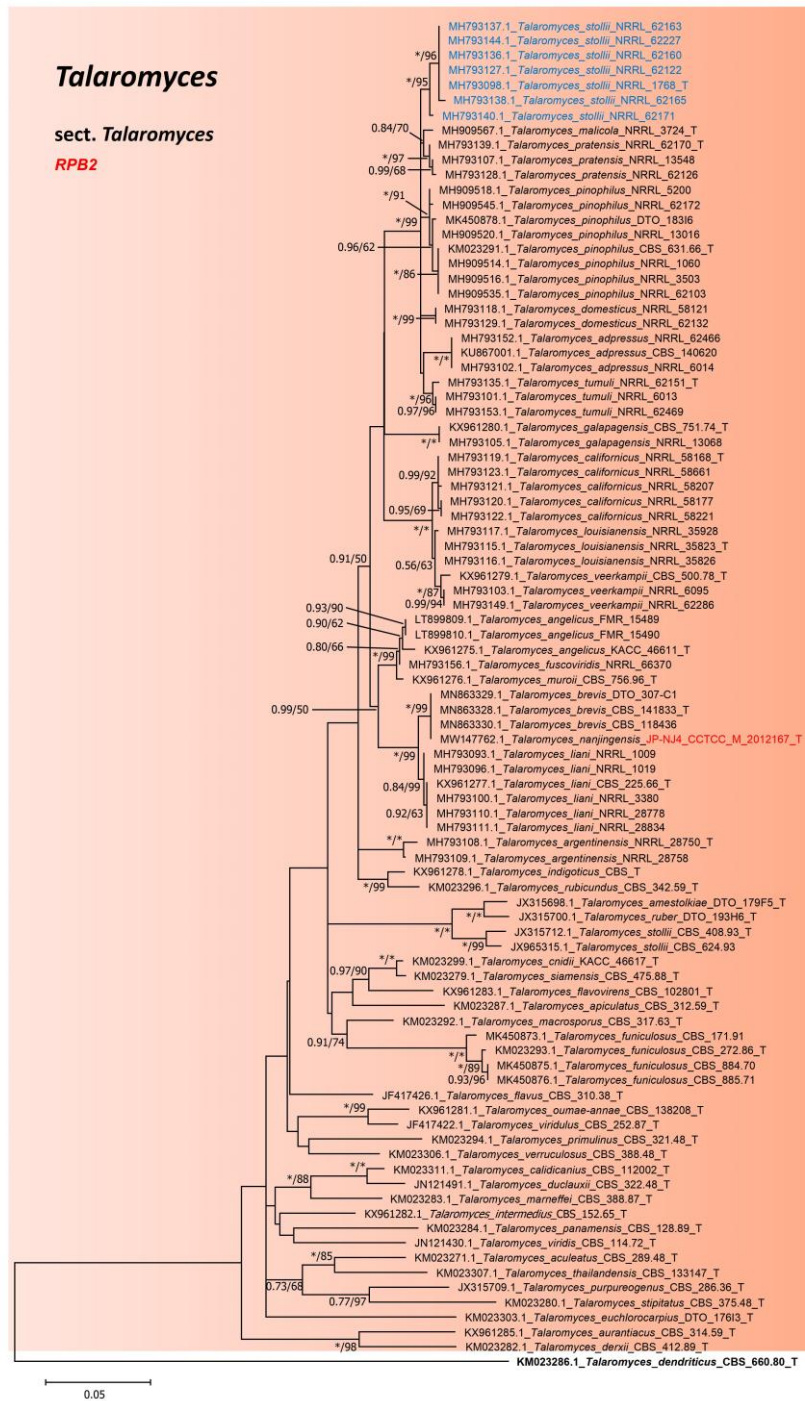

Figure S4 Maximum likelihood phylogeny of *RPB2* gene regions for strain JP-NJ4 and other species classified in *Talaromyces* sect. *Talaromyces*. *Talaromyces dendriticus* (CBS\_660.80\_T) was chosen as out-group. Support in nodes is indicated above branches and is represented by posterior probabilities (BI analysis) and bootstrap values (ML analysis). Full support (1.00/100%) is indicated with an asterisk (\*). Bootstrap values lower

than 50 is hidden. Best-fit model of Bayesian Inference phylogeny according to BIC: K80 (K2P) +I+G4; Best-fit model of Maximum likelihood phylogeny according to AIC: Kimura 2-parameter (K2) +G+I; alignment, *RPB2* 718 bp. Scale bar: 0.05 substitutions per nucleotide position. T indicates ex type. The strain with red font is the strain JP-NJ4 to be identified.

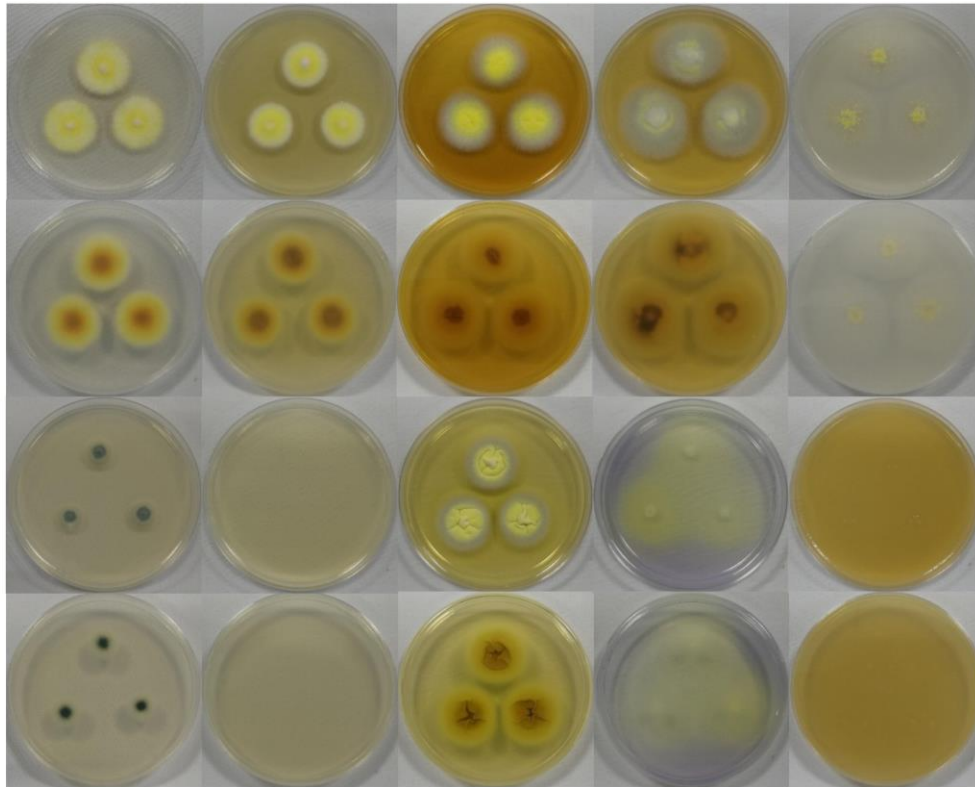

Figure S5 Macromorphological characters of strain JP-NJ4 (CCTCC M 2012167) (Inoculation at 25°C for 7 days). Colonies from left to right: (the top two rows) CZ, CYA, MEA, MEAbI, OA and the reverse side corresponding to these media; (the bottom two rows) DG18, CYAS, YES, CREA, HAY and the reverse side corresponding to these media (The background color is white).

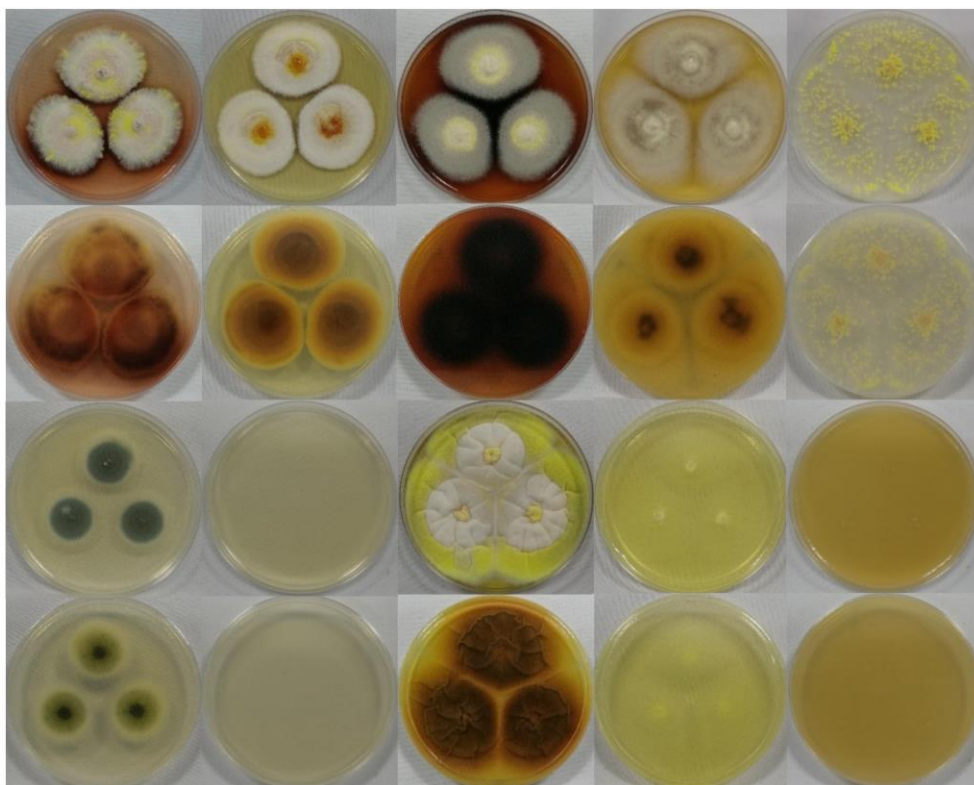

Figure S6 Macromorphological characters of strain JP-NJ4 (Inoculation at 25°C for 14 days). Colonies from left to right: (the top two rows) CZ, CYA, MEA, MEAbI, OA and the reverse side corresponding to these media; (the bottom two rows) DG18, CYAS, YES, CREA, HAY and the reverse side corresponding to these media. (The background color is white)



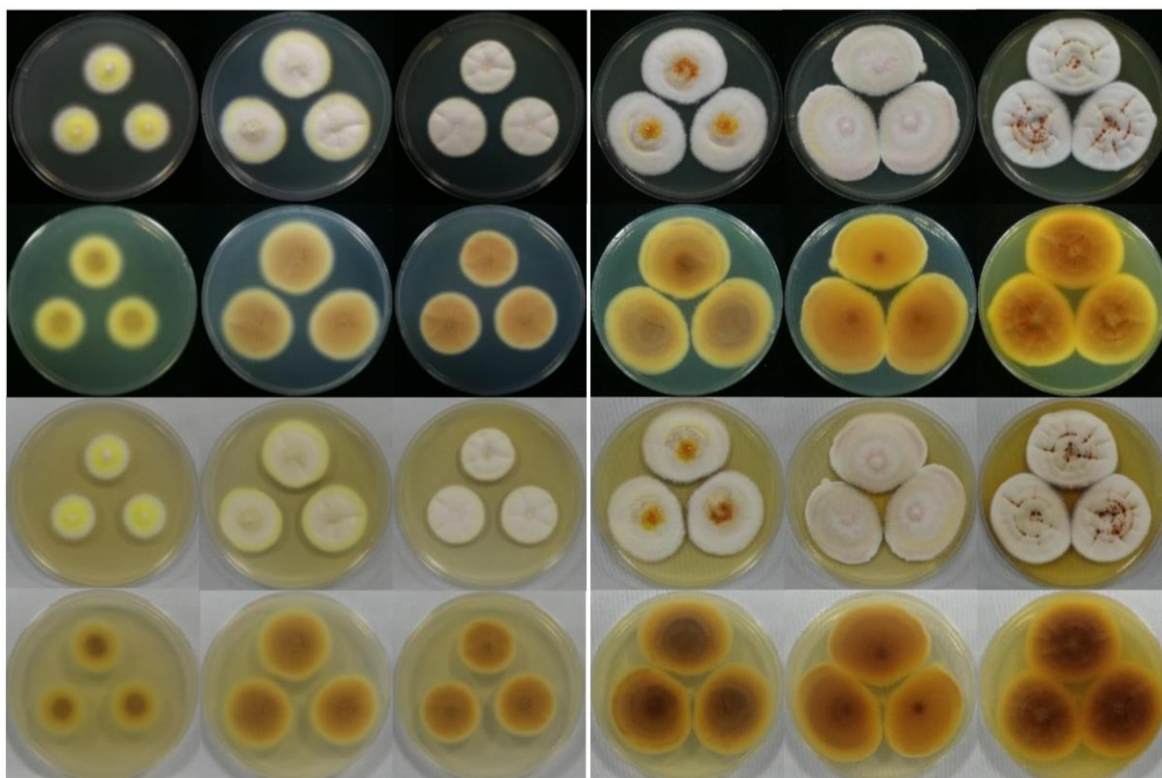

Figure S7 Macromorphology of strain JP-NJ4 under different temperature and culture days, Colonies from left to right: (the top two rows) CYA 25°C, 30°C, 37°C, inoculation for 7 days. CYA 25°C, 30°C, 37°C, inoculation for 14 days. and the reverse side corresponding to these media (The background color is black); (the bottom two rows) (The background color is white).

| DNA Sequences                                           | Translated Protein Sequences |
|---------------------------------------------------------|------------------------------|
| Species/Abbrev                                          | Group Name                   |
| 1. MK451201.1_Talaromyces_liani_CMV01ID7                | liani                        |
| 2. XM661140.1_Talaromyces_liani_DTO_058F2               |                              |
| 3. MW92902.1_Talaromyces_liani_NRRL_1009                |                              |
| 4. MW92905.1_Talaromyces_liani_NRRL_1019                |                              |
| 5. MW92909.1_Talaromyces_liani_NRRL_3380                |                              |
| 6. MW92919.1_Talaromyces_liani_NRRL_28778               |                              |
| 7. MW92920.1_Talaromyces_liani_NRRL_28834               |                              |
| 8. XM661139.1_Talaromyces_liani_CBS_118434              |                              |
| 9. XM661138.1_Talaromyces_liani_CBS_118895              |                              |
| 10. JX091380.1_Talaromyces_liani_CBS_225.66_T           |                              |
| 11. MN531288.1_Talaromyces_liani_KUC21412               | nanjingensis                 |
| 12. MW147759.1_Talaromyces_nanjingensis_CCTCC_M_2012167 |                              |
| 13. MN673338.1_Talaromyces_brevis_CBS_141833_T          |                              |
| 14. MN673339.1_Talaromyces_brevis_DTO_307-C1            |                              |
| 15. MN673340.1_Talaromyces_brevis_CBS_118436            |                              |

A

| DNA Sequences                   |            | Translated Protein Sequences |     |
|---------------------------------|------------|------------------------------|-----|
|                                 | Group Name |                              |     |
| 1. MM451201.1_Tala              |            | ...                          | ... |
| 2. KM066140.1_Tala              |            | ...                          | ... |
| 3. MH792902.1_Tala              |            | ...                          | ... |
| 4. MH792905.1_Tala              |            | ...                          | ... |
| 5. MH792909.1_Tala              |            | ...                          | ... |
| 6. MH792919.1_Tala liani        |            | ...                          | ... |
| 7. MH792920.1_Tala              |            | ...                          | ... |
| 8. KM066139.1_Tala              |            | ...                          | ... |
| 9. KM066138.1_Tala              |            | ...                          | ... |
| 10. JX091380.1_Tal              |            | ...                          | ... |
| 11. MN531288.1_Tal              |            | ...                          | ... |
| 12. MW147759.1_Tal nanjingensis |            | ...                          | ... |
| 13. MN863338.1_Tal              |            | ...                          | ... |
| 14. MN863339.1_Tal brevis       |            | ...                          | ... |
| 15. MN863340.1_Tal              |            | ...                          | ... |

| DNA Sequences                   |            | Translated Protein Sequences |   |
|---------------------------------|------------|------------------------------|---|
| Species/Abbrev                  | Group Name |                              |   |
| 1. MK451201.1_Tala              |            | A                            | A |
| 2. KM066140.1_Tala              |            | A                            | A |
| 3. MH792902.1_Tala              |            | A                            | A |
| 4. MH792905.1_Tala              |            | A                            | A |
| 5. MH792909.1_Tala              |            | A                            | A |
| 6. MH792919.1_Talalliani        |            | A                            | A |
| 7. MH792920.1_Tala              |            | A                            | A |
| 8. KM066139.1_Tala              |            | A                            | A |
| 9. KM066138.1_Tala              |            | A                            | A |
| 10. JX091380.1_Tal              |            | A                            | A |
| 11. MN531288.1_Tal              |            | A                            | A |
| 12. MWJ47759.1_Tal.nanjingensis |            | A                            | A |
| 13. MN663338.1_Tal              |            | A                            | A |
| 14. MN663339.1_Tal.brevis       |            | A                            | A |
| 15. MN663340.1_Tal              |            | A                            | A |

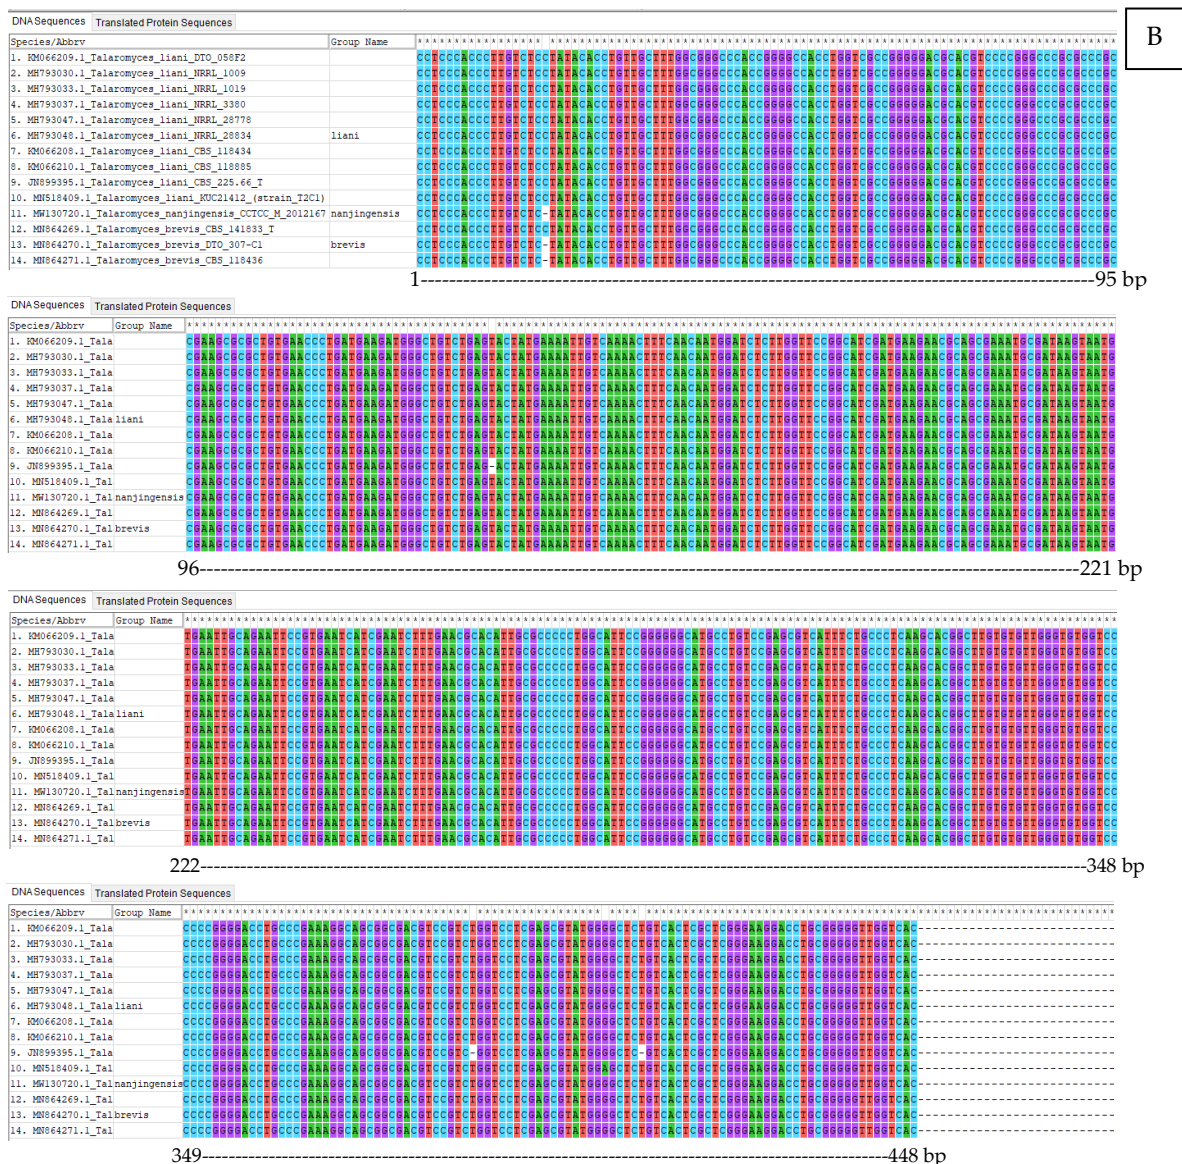

Figure S8 Base alignment and differences in specific genes of *Talaromyces nanjingensis*, *T. brevis* and *T. liani*.  
A. *BenA* gene, alignment, 348 bp; B. ITS region, alignment, 448 bp.

Table S1 Primers for amplification and sequencing of ITS and specific genes in strain JP-NJ4

| Gene/Region                                                                   | Primer name | Direction | Primer sequence (5'-3')   | Reference                                                       |
|-------------------------------------------------------------------------------|-------------|-----------|---------------------------|-----------------------------------------------------------------|
| Internal Transcribed Spacer rDNA area (ITS)                                   | ITS1        | Forward   | TCCGTAGGTGAACCTGCGG       | White et al. 1990                                               |
|                                                                               | ITS4        | Reverse   | TCCTCCGCTTATTGATATGC      |                                                                 |
|                                                                               | V9G         | Forward   | TTACGTCCCTGCCCTTTGTA      | de Hoog & van den Ende 1998                                     |
|                                                                               | LS266       | Reverse   | GCATTCCCAAACAACCTCGACTC   |                                                                 |
| $\beta$ -tubulin ( <i>BenA</i> )                                              | Bt2a        | Forward   | GGTAACCAAATCGGTGCTGCTTTC  | Lousie & Donaldson 1995                                         |
|                                                                               | Bt2b        | Reverse   | ACCCTCAGTGTAGTGACCCTTGCC  |                                                                 |
| Calmodulin ( <i>CaM</i> )                                                     | CMD5        | Forward   | CCGAGTACAAGGAGGCCTTC      | Rivera & Seifert 2011                                           |
|                                                                               | CMD6        | Reverse   | CCGATAGAGGTCATAACGTGG     |                                                                 |
|                                                                               | CMD5'       | Forward   | CCGAGTACAAGGARGCCTTC      | Hong et al. 2006                                                |
|                                                                               | CMD6'       | Reverse   | CCGATRGAGGTCATRACGTGG     |                                                                 |
|                                                                               | CF1         | Forward   | GCCGACTCTTTGACYGAR        | Peterson et al. 2005                                            |
|                                                                               | CF4         | Reverse   | CATCATRAGYTGGAC           |                                                                 |
| DNA-dependent RNA polymerase II (beta) largest subunit ( <i>RPB1</i> )        | F1843       | Forward   | ATTTYGAYGGTGAYGARATGAAC   | Houbraken & Samson 2011                                         |
|                                                                               | R3096       | Reverse   | GRACRGTDCCRTCATAYTTRACC   |                                                                 |
|                                                                               | R2623       | Internal  | GCRTTGTT SARATCCTTMARRCTC | Primer R2623 is an internal primer for sequencing               |
| DNA-dependent RNA polymerase II (beta) second largest subunit ( <i>RPB2</i> ) | 5F          | Forward   | GAYGAYMGWGATCAYTTYGG      | Liu et al. 1999 Used for identification of <i>Talaromyces</i> ; |
|                                                                               | 7CR         | Reverse   | CCCATRGCTTGYTTRCCCAT      |                                                                 |
|                                                                               |             |           |                           | Secondary primers for identification of <i>Penicillium</i>      |
|                                                                               | 5Feur       | Forward   | GAYGAYCGKGAYCAYTTCGG      | Houbraken et al. 2012                                           |
|                                                                               | 7CReur      | Reverse   | CCCATRGCYTGYTTRCCCAT      |                                                                 |
|                                                                               |             |           |                           | Used for identification of <i>Penicillium</i>                   |
|                                                                               | F311        | Internal  | CATGATYCARCGIAAYATGGA     | Houbraken & Samson 2011                                         |
|                                                                               | R310        | Internal  | CCATRTTICGYTGRATCATGAA    |                                                                 |

Table S2 Media required for the identification of strain JP-NJ4

| Medium type and formulation                                                     |         |                                      |         |                                                                                                                                     |         |                   |         |                                                                             |         |                   |         |
|---------------------------------------------------------------------------------|---------|--------------------------------------|---------|-------------------------------------------------------------------------------------------------------------------------------------|---------|-------------------|---------|-----------------------------------------------------------------------------|---------|-------------------|---------|
| Czapek stock solution (CSS)                                                     |         |                                      |         | Trace elements stock solution (TESS)                                                                                                |         |                   |         | Czapek's agar (CZ)                                                          |         |                   |         |
| NaNO <sub>3</sub>                                                               | 30 g    | MgSO <sub>4</sub> ·7H <sub>2</sub> O | 5 g     | CuSO <sub>4</sub> ·5H <sub>2</sub> O                                                                                                | 0.5 g   |                   |         | CSS                                                                         | 10 ml   | TESS              | 1 ml    |
| KCl                                                                             | 5 g     | FeSO <sub>4</sub> ·7H <sub>2</sub> O | 0.1 g   | ZnSO <sub>4</sub> ·7H <sub>2</sub> O                                                                                                | 0.1 g   |                   |         | Sucrose                                                                     | 30 g    | Agar              | 20 g    |
| dH <sub>2</sub> O                                                               | 100 ml  |                                      |         | dH <sub>2</sub> O                                                                                                                   | 100 ml  |                   |         | dH <sub>2</sub> O                                                           | 1000 ml |                   |         |
| *Store at 4-10°C. (pitt 1979)                                                   |         |                                      |         | *Store at 4-10°C. (pitt 1979)                                                                                                       |         |                   |         | *Mix well and autoclave at 121°C for 15 min. (Raper and Thom 1949)          |         |                   |         |
| Czapek Yeast Autolysate agar (CYA)                                              |         |                                      |         | Czapek Yeast Autolysate agar with 5% NaCl (CYAS)                                                                                    |         |                   |         | Blakeslee's Malt extract agar (MEAbI)                                       |         |                   |         |
| CSS                                                                             | 10 ml   | TESS                                 | 1 ml    | CSS                                                                                                                                 | 10 ml   | TESS              | 1 ml    | Glucose                                                                     | 20 g    | Agar              | 20 g    |
| Sucrose                                                                         | 30 g    | Agar                                 | 20 g    | Sucrose                                                                                                                             | 30 g    | Agar              | 20 g    | TESS                                                                        | 1 ml    | dH <sub>2</sub> O | 1000 ml |
| K <sub>2</sub> HPO <sub>4</sub>                                                 | 1 g     | dH <sub>2</sub> O                    | 1000 ml | K <sub>2</sub> HPO <sub>4</sub>                                                                                                     | 1 g     | dH <sub>2</sub> O | 1000 ml | Malt extract (Oxoid)                                                        |         | 20 g              |         |
| Yeast extract (Difco)                                                           | 5 g     |                                      |         | NaCl                                                                                                                                | 50 g    |                   |         | Peptone (Oxoid)                                                             |         | 1 g               |         |
|                                                                                 |         |                                      |         | Yeast extract (Difco)                                                                                                               | 5 g     |                   |         |                                                                             |         |                   |         |
| *Mix well and autoclave at 121°C for 15 min. pH 6.2 ± 0.2. (Pitt 1979)          |         |                                      |         | *Mix well and autoclave at 121°C for 15 min. pH 6.2 ± 0.2. (Visagie et al. 2014)                                                    |         |                   |         | *Mix well and autoclave at 121°C for 15 min. pH 5.3 ± 0.2. (Blakeslee 1915) |         |                   |         |
| Malt Extract agar (MEA)                                                         |         |                                      |         | Dichloran 18% Glycerol agar (DG18)                                                                                                  |         |                   |         | Yeast extract sucrose agar (YES)                                            |         |                   |         |
| TESS                                                                            | 1 ml    | Agar                                 | 20 g    | TESS                                                                                                                                | 1 ml    | Agar              | 20 g    | Sucrose                                                                     | 150 g   | TESS              | 1 ml    |
| dH <sub>2</sub> O                                                               | 1000 ml |                                      |         | dH <sub>2</sub> O                                                                                                                   | 1000 ml |                   |         | Agar                                                                        | 20 g    | dH <sub>2</sub> O | 885 ml  |
| Malt extract (Oxoid CM0059)                                                     | 50 g    |                                      |         | Chloramphenicol                                                                                                                     | 0.05 g  |                   |         | MgSO <sub>4</sub> ·7H <sub>2</sub> O                                        | 0.5 g   |                   |         |
|                                                                                 |         |                                      |         | Glycerol (anhydrous)                                                                                                                | 220 g   |                   |         | Yeast extract (Difco)                                                       | 20 g    |                   |         |
|                                                                                 |         |                                      |         | Dichloran-Glycerol-agar-base (Oxoid)                                                                                                | 31.5 g  |                   |         |                                                                             |         |                   |         |
| *Mix well and autoclave at 115°C for 10 min. pH 5.4 ± 0.2. (Samson et al. 2010) |         |                                      |         | *Mix well and autoclave at 121°C for 15 min. After autoclaving, add 0.05 g chlortetracycline. pH 5.6 ± 0.2. (Hocking and Pitt 1980) |         |                   |         | *Mix well and autoclave at 121°C for 15 min. pH 6.5 ± 0.2. (Frisvad 1981)   |         |                   |         |
| Oatmeal agar (OA)                                                               |         |                                      |         | Creatine sucrose agar (CREA)                                                                                                        |         |                   |         | Hay infusion agar (HAY)                                                     |         |                   |         |



|                                                                                                                           |      |                   |         |                                                                           |      |                   |         |                                                                                                 |         |      |      |
|---------------------------------------------------------------------------------------------------------------------------|------|-------------------|---------|---------------------------------------------------------------------------|------|-------------------|---------|-------------------------------------------------------------------------------------------------|---------|------|------|
| TESS                                                                                                                      | 1 ml | Agar              | 20 g    | Sucrose                                                                   | 30 g | KCl               | 0.5 g   | Hay                                                                                             | TESS    | 1 ml |      |
| Oatmeal /flakes                                                                                                           | 30 g | dH <sub>2</sub> O | 1000 ml | Creatine·1H <sub>2</sub> O                                                | 3 g  | TESS              | 1 ml    | dH <sub>2</sub> O                                                                               | 1000 ml | Agar | 20 g |
| 1. First autoclave flakes in 1000 ml d H <sub>2</sub> O. (121°C for 15 min)                                               |      |                   |         | Agar                                                                      | 20 g | dH <sub>2</sub> O | 1000 ml | 1. Fill a 1-liter beaker with hay                                                               |         |      |      |
| 2.Squeeze mixture through cheese cloth and use flow through, topping up to 1000 ml with d H <sub>2</sub> O with 20 g agar |      |                   |         | K <sub>3</sub> PO <sub>4</sub> ·7H <sub>2</sub> O                         |      | 1.6 g             |         | 2. Add water and boil until the beaker becomes the color of weak tea.                           |         |      |      |
|                                                                                                                           |      |                   |         | MgSO <sub>4</sub> ·7H <sub>2</sub> O                                      |      | 0.5 g             |         | 3. Filter the water through cleesecloth or carefully pour off the water leaving the hay behind. |         |      |      |
|                                                                                                                           |      |                   |         | FeSO <sub>4</sub> ·7H <sub>2</sub> O                                      |      | 0.01 g            |         |                                                                                                 |         |      |      |
|                                                                                                                           |      |                   |         | Bromocresol purple                                                        |      | 0.05 g            |         |                                                                                                 |         |      |      |
| * Autoclave at 121°C for 15 min. pH 6.5 ± 0.2. (Samson et al. 2010)                                                       |      |                   |         | *Mix well and autoclave at 121°C for 15 min. pH 8.0 ± 0.2. (Frisvad 1981) |      |                   |         | *Mix well and autoclave at 121°C for 20 min. (David 1993)                                       |         |      |      |

Notes: CSS is the abbreviation of Czapek stock solution; TESS is the abbreviation of Trace elements stock solution
